# Supplementary material
Source: PubMed Central journal article supplement (PMC3422445)
Supplement: NIHMS382495-supplement-01.pdf [file NIHMS382495-supplement-01.pdf]

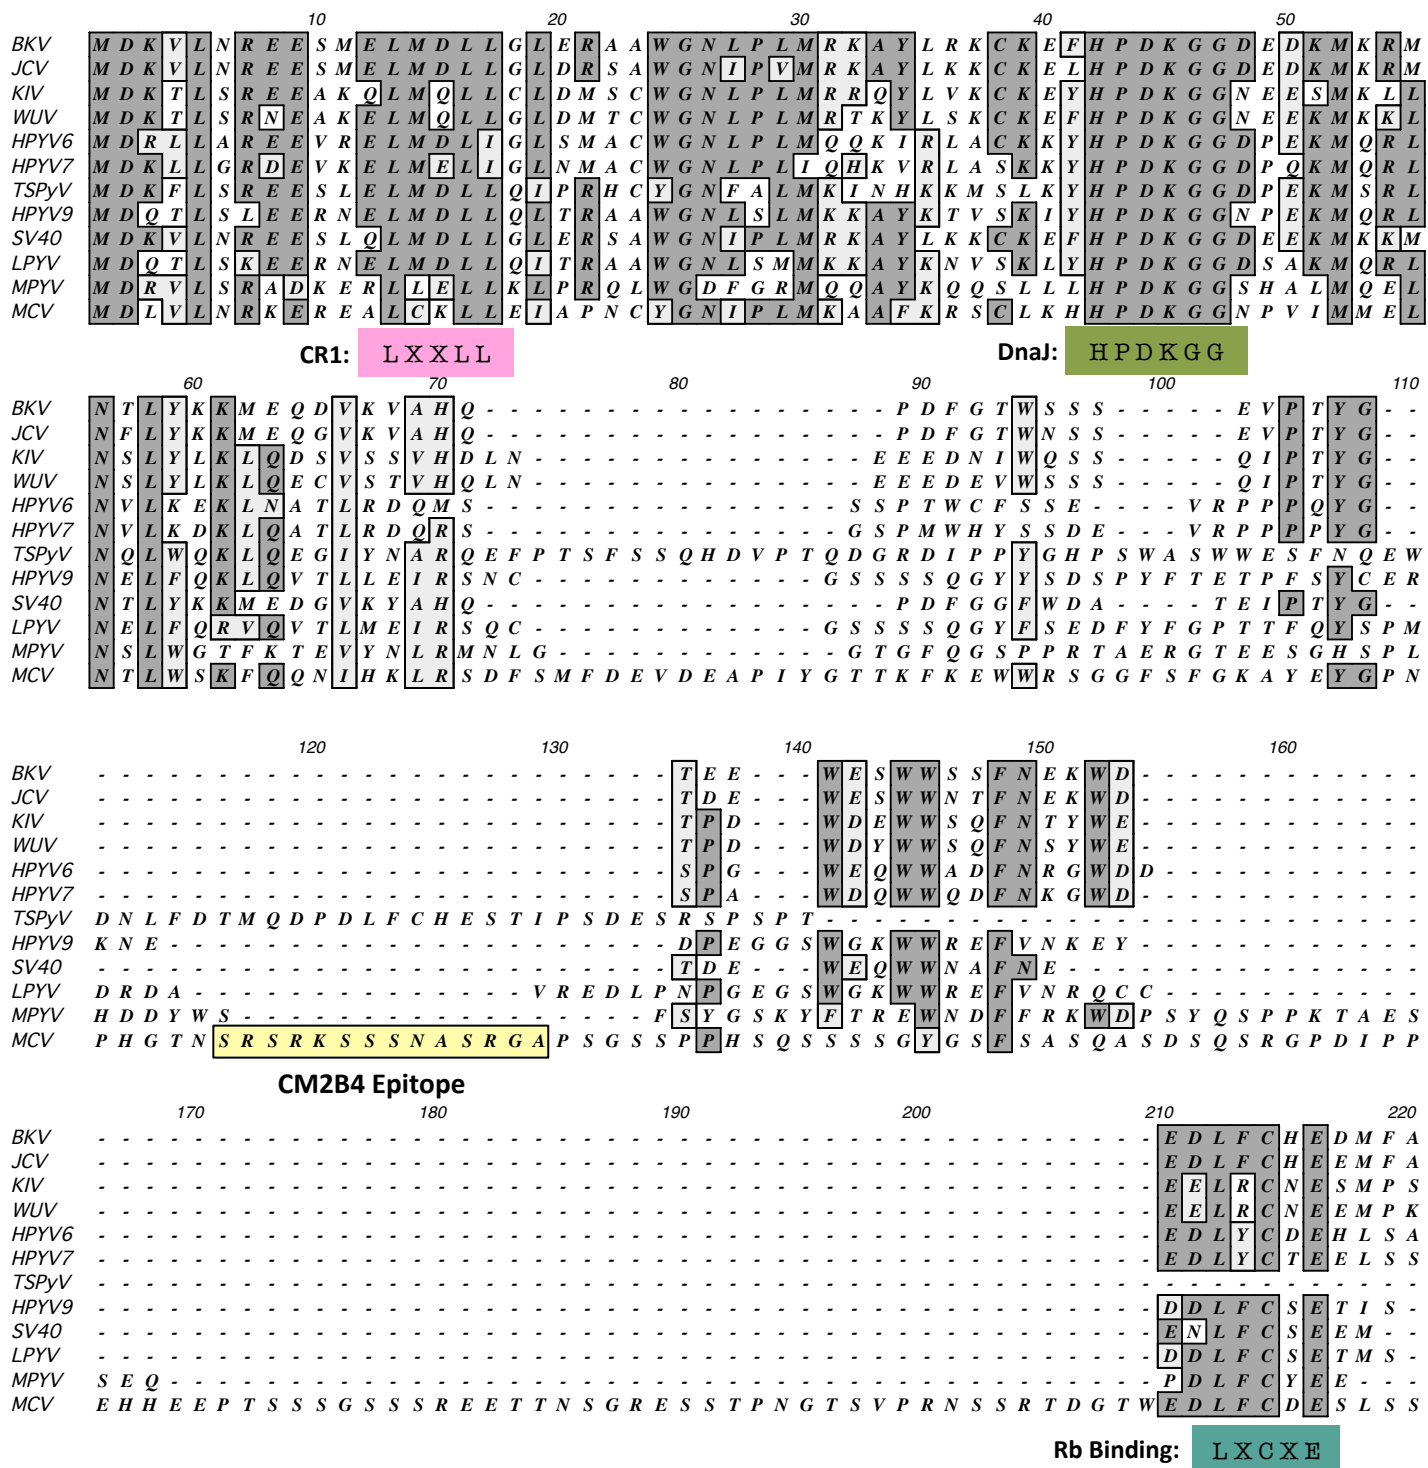

**Figure S1. Updated amino acid alignment of MCV with all known human polyomaviruses, SV40, LPyV and MPyV.** The three conserved domains CR1 (Conserved region 1), DnaJ or J domain and Rb binding motif are highlighted in colour. Region containing epitope site for CM2B4 is not conserved with other polyomaviruses. The alignment was done using ClustalW multiple alignment (Gonnet matrix), Macvector software.

**Supplementary Table S1. MCV Detection in MCC Samples**

| Country     | Total | MCV +ve    | Method Used                                                                    | Reference                                                                          |
|-------------|-------|------------|--------------------------------------------------------------------------------|------------------------------------------------------------------------------------|
| USA         | 10    | 8 (80%)    | PCR (LT and VP1) sequence analysis, Southern hybridization, and CM2B4 Staining | Feng et al, Science 2008 and Shuda et al., Int J Cancer 2009                       |
| USA         | 16    | 11 (68.7%) | qPCR (LT)                                                                      | Garneski et al., J Invest Dermatology 2009                                         |
| USA         | 13    | 7 (53.8%)  | PCR (LT and VP1)                                                               | Ridd et al., J Invest Dermatology, 2009                                            |
| USA         | 41    | 32 (78%)   | PCR (LT and VP1)                                                               | Duncavage et al., Modern Pathology 2009                                            |
| USA         | 53    | 42 (79.2%) | qPCR and CM2B4                                                                 | Busam et al., Am J Surg Pathol 2009                                                |
| USA         | 31    | 24 (77.4%) | qPCR (VP1)                                                                     | Carter et al., J Nat Cancer Institute 2009                                         |
| USA         | 22    | 13 (59.1%) | qPCR (LT)                                                                      | Paulson et al., J Invest Dermatol 2009                                             |
| USA         | 23    | 17 (73.9%) | PCR (Tag)                                                                      | Bhatia et al., Int J Cancer 2010                                                   |
| USA         | 7     | 6 (85.7%)  | qPCR (LT and VP1)                                                              | Loyo et al., Int J Cancer 2010                                                     |
| USA         | 6     | 4 (66.7%)  | PCR (LT)                                                                       | Lewis et al., Oral Surg, Oral Medicine, Oral Pathol, Oral Radiolo and Endodon 2010 |
| USA         | 20    | 15 (75%)   | CM2B4 Staining                                                                 | Reisinger et al., J Am Acad Dermatol 2010                                          |
| USA         | 4     | 2 (50%)    | qPCR (LT)                                                                      | Toracchio et al., Emerg Infect Diseases 2010                                       |
| USA         | 80    | 59 (73.7%) | qPCR (LT)                                                                      | Paulson et al., J Clin Oncol 2011                                                  |
| USA         | 4     | 4 (100%)   | Hybrid capture and next-gen sequencing                                         | Duncavage et al., J Molecular Diagnostics 2011                                     |
| USA         | 51    | 47 (92.2%) | CM5E1 and CM2B4 Staining                                                       | Shuda et al., JCI 2011                                                             |
| USA         | 52    | 38 (73.1%) | qPCR (LT)                                                                      | Lee et al., J Clin Virology 2011                                                   |
| USA         | 58    | 38 (65.5%) | PCR (LT)                                                                       | Nardi et al., Clin Cancer Research 2012                                            |
| Switzerland | 30    | 20 (66.6%) | PCR (LT and VP1)                                                               | Mangana et al., Dermatology 2010                                                   |
| Spain       | 36    | 21 (58.3%) | CM2B4 staining                                                                 | Shuda et al., Int J Cancer 2009                                                    |
| Netherlands | 7     | 3 (42.8%)  | PCR and sequence analysis (LT)                                                 | Wetzels et al., PLoS ONE, 2009                                                     |
| Korea       | 7     | 7 (100%)   | PCR (LT)                                                                       | Woo et al., J Plastic Reconstructive and Aesthetic Surg 2010                       |
| Korea       | 14    | 12 (85.7%) | qPCR (LT and VP1) and CM2B4 Staining                                           | Jung et al., Histol Histopathol 2011                                               |
| Japan       | 11    | 6 (54.5%)  | PCR and qPCR (Tag and VP1)                                                     | Katano et al., J Medical Virology 2009                                             |
| Japan       | 14    | 11 (78.6%) | PCR (LT)                                                                       | Nakajima et al., J Dermatol Sci 2009                                               |
| Japan       | 19    | 11 (57.8%) | qPCR (LT) and LT Ab Staining                                                   | Nakamura et al., Virology 2010                                                     |
| Japan       | 26    | 20 (76.9%) | qPCR (LT) and CM2B4 Staining                                                   | Kuwamoto et al., Human Pathology 2011                                              |

|           |     |             |                                          |                                                           |
|-----------|-----|-------------|------------------------------------------|-----------------------------------------------------------|
| Italy     | 9   | 8 (88.8%)   | PCR (LT and VP1)                         | Paolini et al., Virology Journal 2011                     |
| Italy     | 70  | 60 (85.7%)  | PCR (LT)                                 | Asioli et al., Modern Pathology 2011                      |
| Italy     | 18  | 18 (100%)   | PCR (LT)                                 | Biase et al., Human Pathology 2011                        |
| Hungary   | 8   | 7 (87.5%)   | PCR (LT) and<br>Sequence analysis        | Varga et al., Br J Dermatol 2009                          |
| Australia | 38  | 33 (86.8%)  | qPCR (LT and VP1)<br>and CM2B4 Staining  | Schrama et al., J Invest Dermatol 2011                    |
| Germany   | 138 | 116 (84.1%) | qPCR (LT and VP1)<br>and CM2B4 Staining  | Schrama et al., J Invest Dermatol 2011                    |
| Germany   | 39  | 30 (76.9%)  | PCR(LT and VP1) and<br>sequence analysis | Kassem et al., Cancer Research 2008                       |
| Germany   | 53  | 45 (84.9%)  | qPCR (LT)                                | Becker et al., J Invest Dermatology 2009                  |
| Germany   | 39  | 35(89.7%)   | PCR (LT)                                 | Wieland et al., Emerg Infect Dis 2009                     |
| Germany   | 98  | 90 (91.8%)  | PCR (LT)                                 | Helmbold et al., Mol Carcinogenesis 2009                  |
| Germany   | 33  | 21 (63.6%)  | PCR (Tag) and<br>Southern hybridization  | Andres et al., J Cut Pathol 2010                          |
| Germany   | 50  | 43 (86%)    | PCR (LT) and CM2B4<br>staining           | Houben et al., Int J Cancer 2010                          |
| Germany   | 59  | 34 (57.6%)  | PCR (LT and VP1)                         | Handschel et al., Int J Oral and Maxillofacial Surg 2010  |
| Germany   | 52  | 43 (82.7%)  | qPCR (LT and VP1)                        | Werling et al., Histopathology 2011                       |
| Germany   | 3   | 2 (66.7%)   | Polyomavirus<br>genotyping assay         | Schmitt et al., Cancer Epid Biomarker and Prevention 2011 |
| Germany   | 34  | 22 (64.7%)  | PCR (Tag)                                | Andres et al., Acta Dermato-Venereologica 2011            |
| Germany   | 43  | 37 (86%)    | qPCR(LT)                                 | Wieland et al., J Am Acad Dermatol 2011                   |
| Germany   | 142 | 111 (78.2%) | qPCR (LT and VP1)                        | Vlahova et al., Br J Dermatology 2012                     |
| France    | 9   | 8 (88.8%)   | PCR (LT and VP1)                         | Foulogne et al., Emerg Infect Dis 2008                    |
| France    | 10  | 10 (100%)   | PCR (Tag and VP1)                        | Sastre-Garau et al., J Pathology 2009                     |
| France    | 32  | 21 (65.6%)  | PCR (LT and VP1)                         | Touze et al., Emerg Infec Diseases 2009                   |
| France    | 18  | 14 (77.8%)  | qPCR (LT and VP1)                        | Foulogne et al., Br J Dermatol 2009                       |
| France    | 43  | 41 (95.3%)  | qPCR (LT)                                | Laude et al., PLoS pathogens 2010                         |
| France    | 68  | 51 (75%)    | qPCR (LT)                                | Touze et al., J Clin Oncol 2011                           |
| France    | 113 | 70 (61.9%)  | PCR (LT) and qPCR<br>(sT)                | Martel-Jantin et al., Virology 2012                       |
| Finland   | 114 | 91 (79.8%)  | qPCR(LT)and DNA<br>sequencing            | Sihto et al., J Natl Cancer Inst 2009                     |
| Finland   | 3   | 1 (33.3%)   | qPCR (LT)                                | Koljonen et al., Nephrology Dialysis Transplantation 2009 |
| Finland   | 5   | 5 (100%)    | qPCR (LT)                                | Koljonen et al., Br J Cancer 2009                         |
| Finland   | 91  | 61 (67%)    | qPCR (LT) and CM2B4<br>Staining          | Sihto et al., Clin Cancer Research 2011                   |

|              |             |                       |                |                                            |
|--------------|-------------|-----------------------|----------------|--------------------------------------------|
| Finland      | 87          | 67 (77%)              | qPCR(LT)       | Waltari et al., Int J Cancer 2011          |
| Canada       | 27          | 17 (62.9%)            | CM2B4 Staining | Ly et al., Human Pathol 2011               |
| Canada       | 30          | 29 (96.7%)            | CM2B4 Staining | Erovic et al., Head and Neck 2012          |
| Australia    | 21          | 5 (23.8%)             | qPCR (LT)      | Garneski et al., J Invest Dermatology 2009 |
| Australia    | 104         | 19 (18.3%)            | CM2B4 Staining | Palik et al., Human Pathology 2011         |
| <b>Total</b> | <b>2354</b> | <b>=1743 (74.04%)</b> |                |                                            |
